# Supplementary material
Source: Springer Nature journal article supplement (https://www.springermedizin.de/resource/supplementary/13041_2013_215_MOESM8_ESM.pdf/25657760)

A

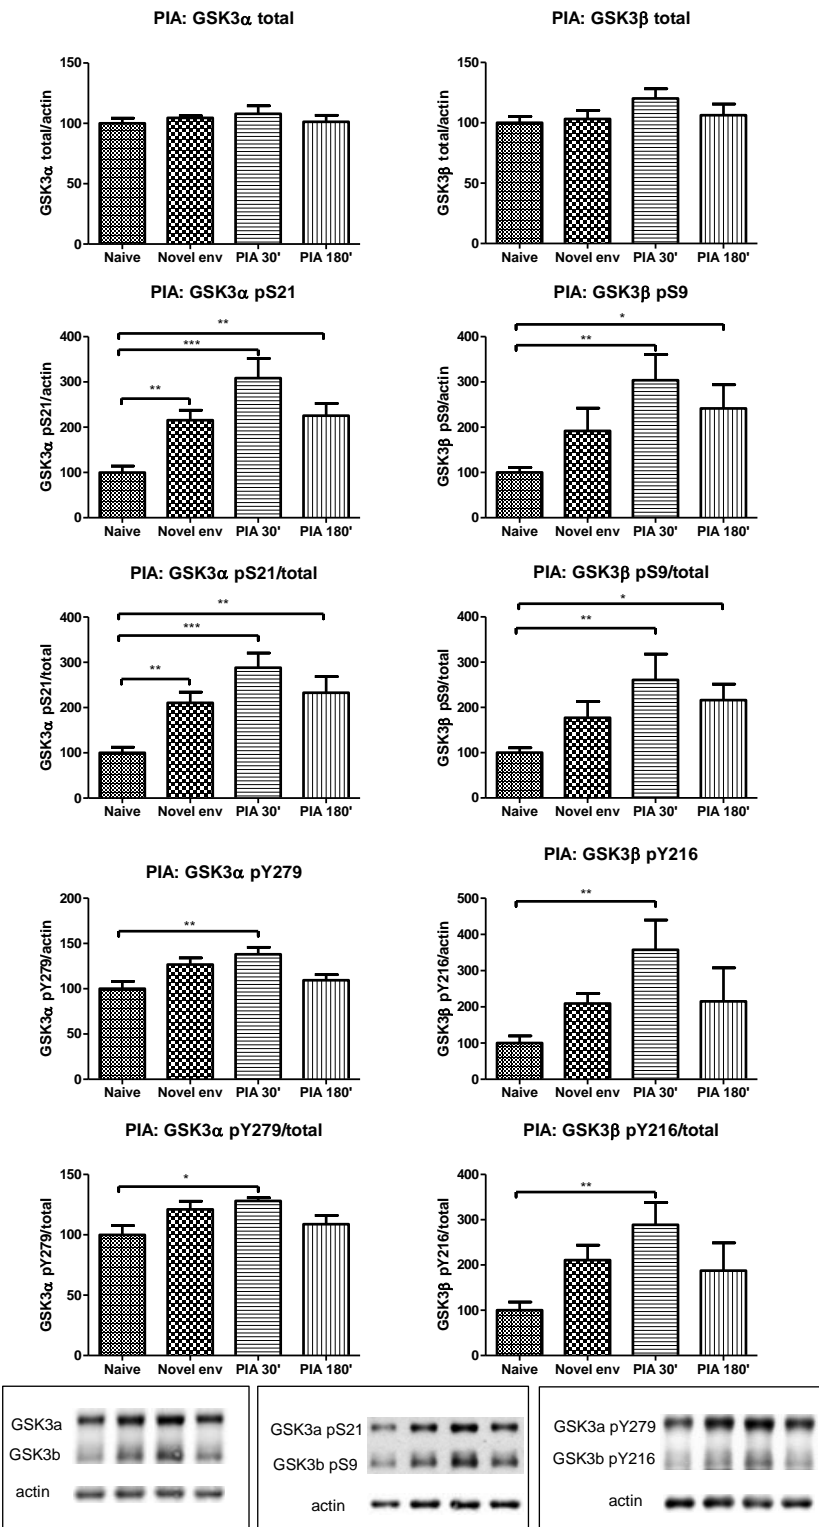

B

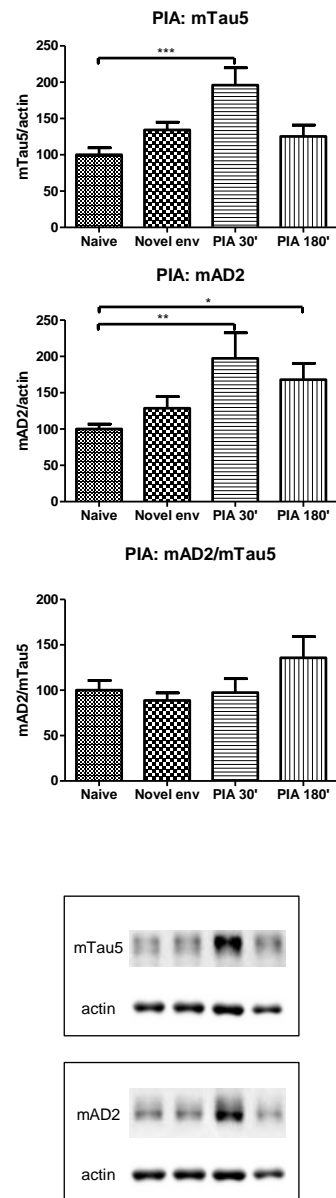

Supplement: MOESM8 [file 25657760]
